# Supplementary material for: Prognostic Factors in Pseudomyxoma Peritonei with Emphasis on the Predictive Role of Peritoneal Cancer Index and Tumor Markers
Source: MDPI journal article supplement (doi:10.3390/cancers15041326), 2023-02-19
Supplement: s1 [file s1]

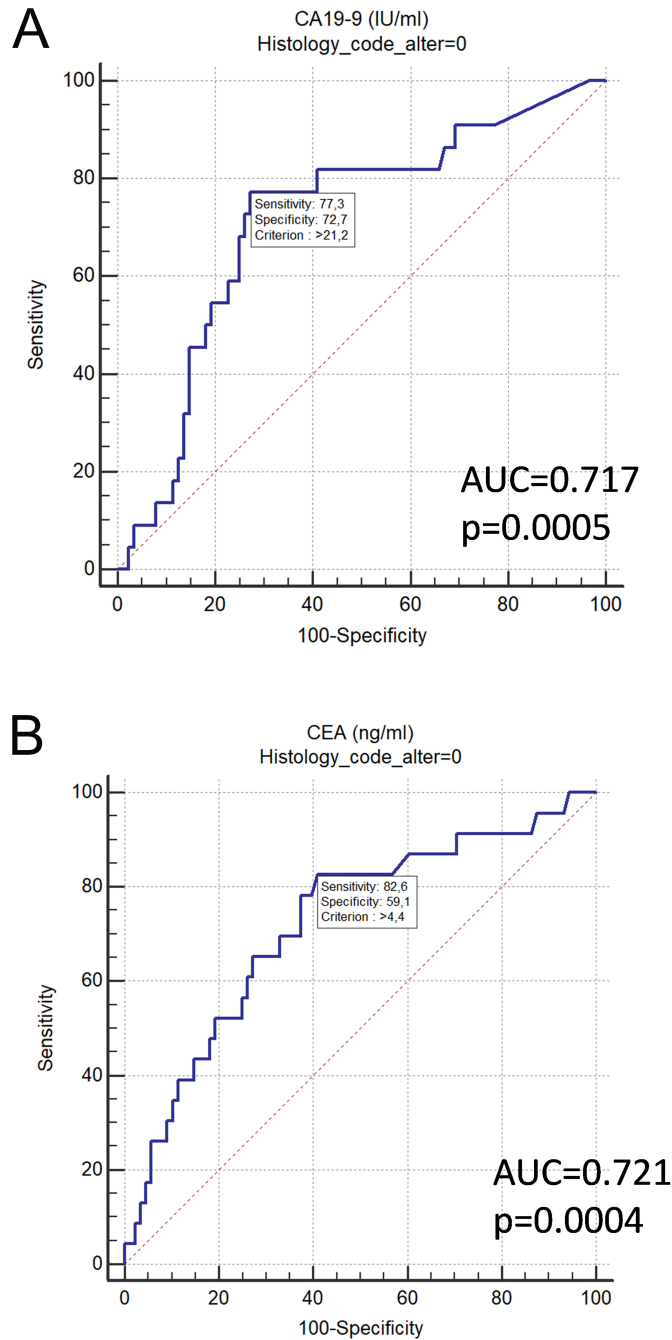

**Supplementary Figure S1. ROC curve analysis for tumor markers.** CA19-9 plasma level in LAMN patients predicts disease relapse with an AUC of 0.717 ( $p=0.0005$ , A) and with a sensitivity of 77.3% and specificity of 72.7%. CEA plasma level in LAMN patients predicts relapse with an AUC of 0.721 ( $p=0.0004$ , B) and with a sensitivity of 82.6% and specificity of 59.1%.

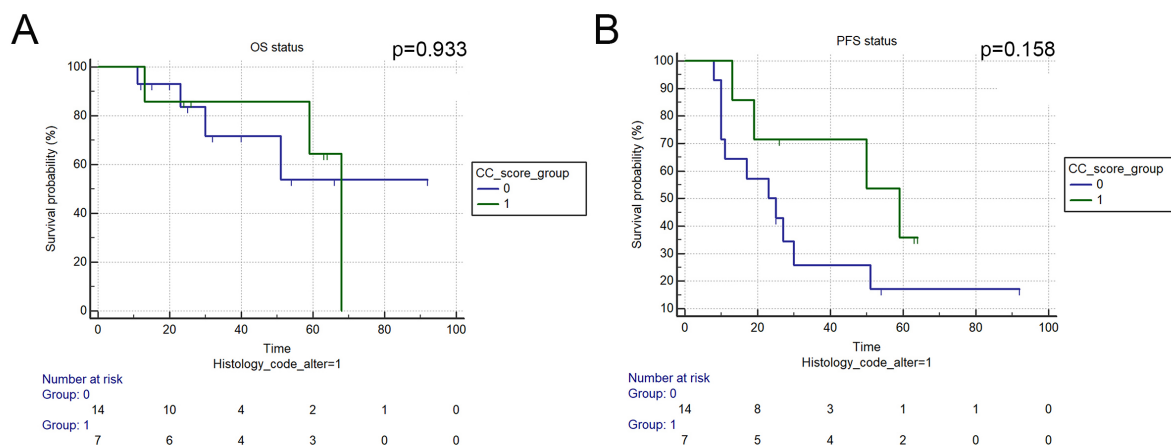

**Supplementary Figure S2. Prognostic role of CC score in HAMN patients.** CC score group (0-1 vs 2) was not prognostic neither for OS ( $p=0.933$ ) nor for PFS in patients with HAMN ( $p=0.158$ ).

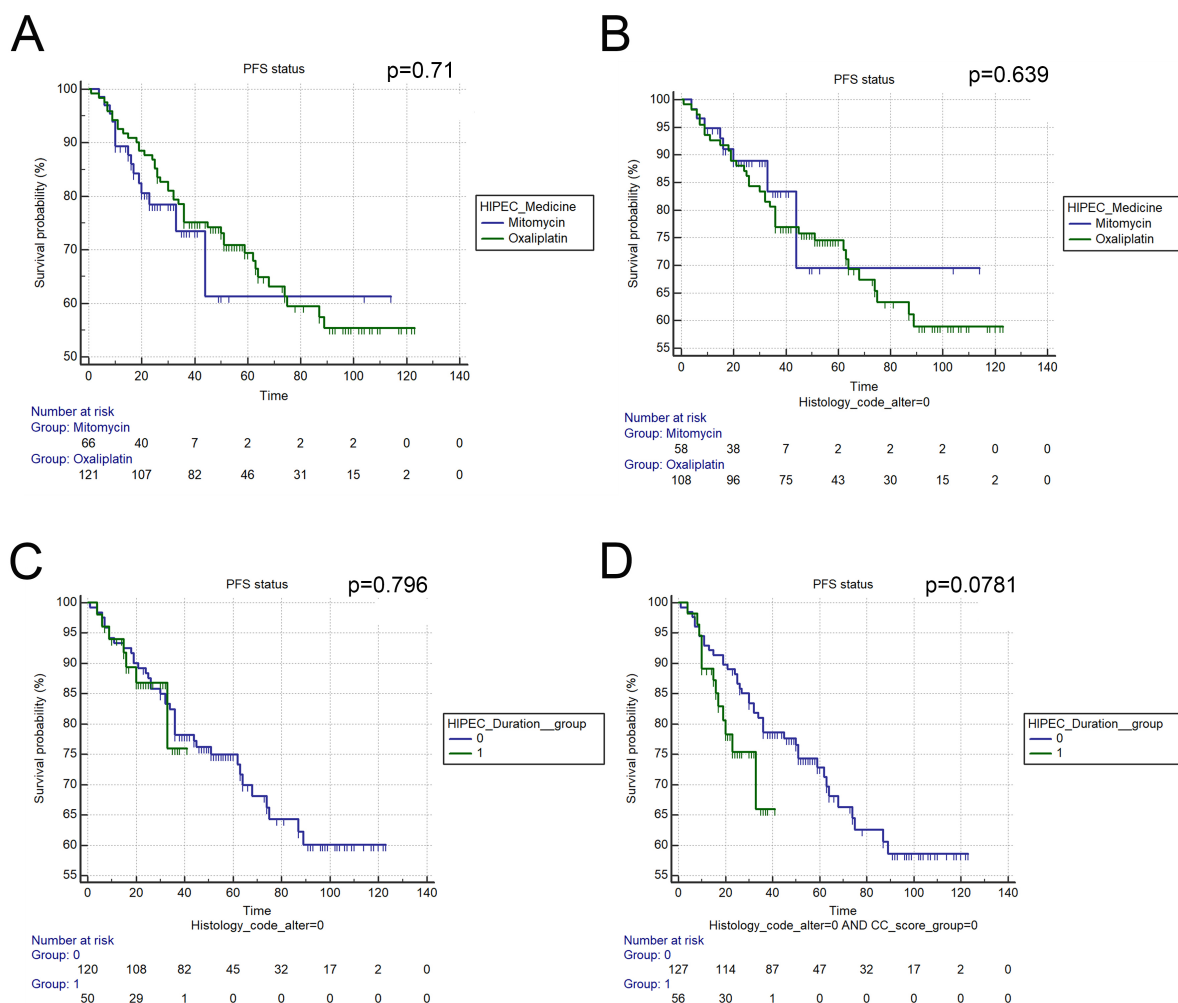

**Supplementary Figure S3. Predictive role of HIPEC medicine and duration in PMP.** Used HIPEC medicine (Mitomycin vs Oxaliplatin) was not predictive regarding PFS neither in the whole cohort

( $p=0.71$ , A) nor in LAMN patients ( $p=0.639$ , B). There was no significant difference in the PFS of patients according to the duration of HIPEC (30-60 mins vs 90 mins) neither in the whole LAMN cohort ( $p=0.796$ , C), nor in LAMN patients with CC0-1 situation ( $p=0.0781$ , D).

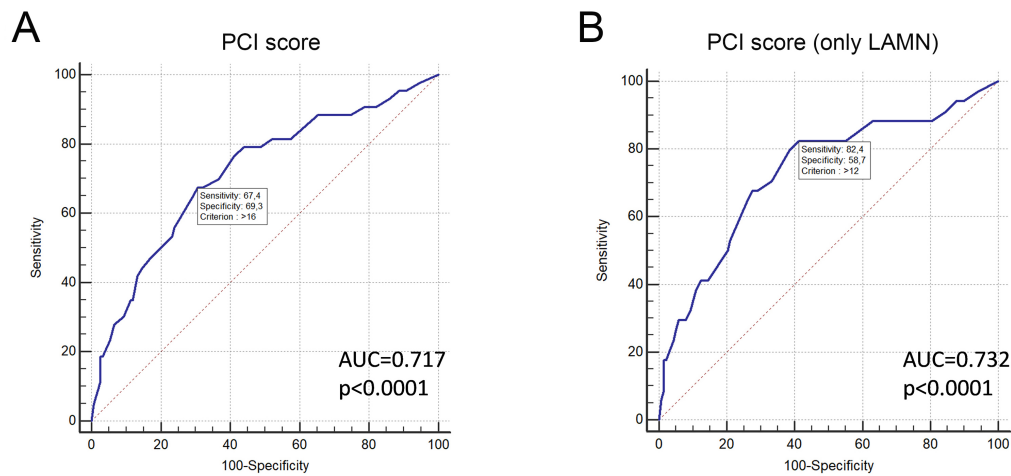

**Supplementary Figure S4. ROC curve analysis for PCI.** PCI in the whole cohort predicts disease relapse with an AUC of 0.717 ( $p<0.0001$ , A) and with a sensitivity of 67.4% and specificity of 69.3%. PCI in LAMN patients predicts relapse with an AUC of 0.732 ( $p<0.0001$ , B) and with a sensitivity of 82.4% and specificity of 58.7%.
